# Supplementary material
Source: publisher site journal article supplement (https://www.spandidos-publications.com/8375/downloadSupplementary)
Supplement: Supplementary file 1 [file downloadSupplementary]

## Sheet: intereact
Table SV. 481 genes interacting with HP
Node	Node_string_ID
A1BG	9606.ENSP00000263100
A2M	9606.ENSP00000323929
ABCA1	9606.ENSP00000363868
ABCA2	9606.ENSP00000344155
ABCA7	9606.ENSP00000263094
ABCB11	9606.ENSP00000497931
ABCG1	9606.ENSP00000354995
ACAN	9606.ENSP00000387356
ACE	9606.ENSP00000290866
ACE2	9606.ENSP00000389326
ACTB	9606.ENSP00000494750
ADAM17	9606.ENSP00000309968
ADAMTS13	9606.ENSP00000360997
ADAMTS7	9606.ENSP00000373472
ADCY10	9606.ENSP00000356825
ADGB	9606.ENSP00000381036
ADIPOQ	9606.ENSP00000389814
AFM	9606.ENSP00000226355
AFP	9606.ENSP00000379138
AGER	9606.ENSP00000364210
AGT	9606.ENSP00000355627
AHSG	9606.ENSP00000273784
AHSP	9606.ENSP00000307199
AIF1	9606.ENSP00000365227
ALAS2	9606.ENSP00000497236
ALB	9606.ENSP00000295897
AMBP	9606.ENSP00000265132
AMN	9606.ENSP00000299155
ANGPTL3	9606.ENSP00000360170
ANXA2	9606.ENSP00000346032
ANXA6	9606.ENSP00000346550
ANXA8	9606.ENSP00000478026
APCS	9606.ENSP00000255040
APOA1	9606.ENSP00000236850
APOA2	9606.ENSP00000356969
APOA4	9606.ENSP00000350425
APOA5	9606.ENSP00000445002
APOB	9606.ENSP00000233242
APOC1	9606.ENSP00000465356
APOC2	9606.ENSP00000466775
APOC3	9606.ENSP00000227667
APOC4	9606.ENSP00000468236
APOD	9606.ENSP00000345179
APOE	9606.ENSP00000252486
APOF	9606.ENSP00000381250
APOH	9606.ENSP00000205948
APOL1	9606.ENSP00000317674
APOM	9606.ENSP00000365081
APOO	9606.ENSP00000368528
APP	9606.ENSP00000284981
APRT	9606.ENSP00000367615
ARG1	9606.ENSP00000349446
ARL14	9606.ENSP00000323847
ASGR1	9606.ENSP00000269299
ASZ1	9606.ENSP00000284629
AZGP1	9606.ENSP00000292401
AZU1	9606.ENSP00000233997
B2M	9606.ENSP00000497910
B3GALNT1	9606.ENSP00000498660
BCHE	9606.ENSP00000264381
BCL11A	9606.ENSP00000496168
BGLAP	9606.ENSP00000357255
BHLHE22	9606.ENSP00000318799
BLVRA	9606.ENSP00000385757
BMP1	9606.ENSP00000305714
BPGM	9606.ENSP00000376840
C1QB	9606.ENSP00000313967
C1R	9606.ENSP00000444271
C1RL	9606.ENSP00000266542
C1S	9606.ENSP00000385035
C3	9606.ENSP00000245907
C4A	9606.ENSP00000396688
C4B	9606.ENSP00000415941
C4BPA	9606.ENSP00000356037
C5	9606.ENSP00000223642
C7	9606.ENSP00000322061
C8A	9606.ENSP00000354458
C8G	9606.ENSP00000360697
C9	9606.ENSP00000263408
CA1	9606.ENSP00000430656
CA2	9606.ENSP00000285379
CA3	9606.ENSP00000285381
CA8	9606.ENSP00000314407
CA9	9606.ENSP00000367608
CAMP	9606.ENSP00000296435
CCL2	9606.ENSP00000225831
CCL3	9606.ENSP00000477908
CCL7	9606.ENSP00000367832
CCN2	9606.ENSP00000356954
CCR5	9606.ENSP00000292303
CD163	9606.ENSP00000352071
CD1B	9606.ENSP00000357150
CD207	9606.ENSP00000386378
CD209	9606.ENSP00000315477
CD22	9606.ENSP00000085219
CD34	9606.ENSP00000310036
CD36	9606.ENSP00000415743
CD3E	9606.ENSP00000354566
CD40	9606.ENSP00000361359
CD40LG	9606.ENSP00000359663
CD46	9606.ENSP00000313875
CD47	9606.ENSP00000355361
CD5	9606.ENSP00000342681
CD5L	9606.ENSP00000357156
CD63	9606.ENSP00000447730
CD68	9606.ENSP00000250092
CD86	9606.ENSP00000332049
CEACAM5	9606.ENSP00000221992
CETP	9606.ENSP00000200676
CFB	9606.ENSP00000416561
CFH	9606.ENSP00000356399
CFHR2	9606.ENSP00000356385
CFI	9606.ENSP00000378131
CFP	9606.ENSP00000247153
CHI3L1	9606.ENSP00000255409
CLDN5	9606.ENSP00000385477
CLEC3B	9606.ENSP00000296130
CLEC4E	9606.ENSP00000299663
CLEC4F	9606.ENSP00000272367
CLEC4M	9606.ENSP00000316228
CLU	9606.ENSP00000315130
CP	9606.ENSP00000264613
CPB2	9606.ENSP00000181383
CR1	9606.ENSP00000356016
CREB3L3	9606.ENSP00000078445
CRP	9606.ENSP00000255030
CSF1	9606.ENSP00000327513
CSN1S1	9606.ENSP00000246891
CSN2	9606.ENSP00000341030
CSN3	9606.ENSP00000304822
CST3	9606.ENSP00000381448
CTRB1	9606.ENSP00000354294
CTRB2	9606.ENSP00000303963
CTRL	9606.ENSP00000458537
CTSB	9606.ENSP00000345672
CTSG	9606.ENSP00000216336
CUBN	9606.ENSP00000367064
CX3CR1	9606.ENSP00000351059
CXCL10	9606.ENSP00000305651
CXCL8	9606.ENSP00000306512
CXCL9	9606.ENSP00000354901
CYB5A	9606.ENSP00000341625
CYB5R1	9606.ENSP00000356218
CYB5R2	9606.ENSP00000437041
CYB5R3	9606.ENSP00000354468
CYB5R4	9606.ENSP00000358695
CYB5RL	9606.ENSP00000434343
CYGB	9606.ENSP00000293230
CYP2C19	9606.ENSP00000360372
CYP3A4	9606.ENSP00000498939
CYP7A1	9606.ENSP00000301645
DEFB1	9606.ENSP00000297439
DHX29	9606.ENSP00000251636
DMBT1	9606.ENSP00000357905
EIF2A	9606.ENSP00000417229
ELANE	9606.ENSP00000466090
ELN	9606.ENSP00000351807
ENSP00000496470	9606.ENSP00000496470
ENSP00000497443	9606.ENSP00000497443
EPB42	9606.ENSP00000497777
EPO	9606.ENSP00000252723
EPOR	9606.ENSP00000222139
ERV3-1	9606.ENSP00000391594
ERVFRD-1	9606.ENSP00000420174
ERVW-1	9606.ENSP00000419945
F10	9606.ENSP00000364709
F11	9606.ENSP00000384957
F13A1	9606.ENSP00000264870
F13B	9606.ENSP00000356382
F2	9606.ENSP00000308541
F3	9606.ENSP00000334145
F5	9606.ENSP00000356771
F7	9606.ENSP00000364731
F8	9606.ENSP00000353393
F9	9606.ENSP00000218099
FABP1	9606.ENSP00000295834
FABP2	9606.ENSP00000274024
FABP3	9606.ENSP00000362817
FAM20A	9606.ENSP00000468308
FAM20C	9606.ENSP00000322323
FCGR1A	9606.ENSP00000358165
FCGR2A	9606.ENSP00000271450
FCGR2B	9606.ENSP00000351497
FCGR3A	9606.ENSP00000356946
FCGR3B	9606.ENSP00000433642
FCGRT	9606.ENSP00000410798
FCN1	9606.ENSP00000360871
FCN3	9606.ENSP00000270879
FETUB	9606.ENSP00000265029
FGA	9606.ENSP00000498441
FGB	9606.ENSP00000306099
FGG	9606.ENSP00000336829
FLVCR1	9606.ENSP00000355938
FN1	9606.ENSP00000346839
FOLR2	9606.ENSP00000298223
FRRS1	9606.ENSP00000287474
FTH1	9606.ENSP00000273550
FURIN	9606.ENSP00000483552
FUT4	9606.ENSP00000351602
FUT5	9606.ENSP00000466880
FUT6	9606.ENSP00000286955
G6PD	9606.ENSP00000377192
GAPDH	9606.ENSP00000380070
GATA1	9606.ENSP00000365858
GC	9606.ENSP00000421725
GDPD1	9606.ENSP00000284116
GFAP	9606.ENSP00000253408
GGCT	9606.ENSP00000275428
GGT1-2	9606.ENSP00000383232
GGTLC3	9606.ENSP00000477856
GH1	9606.ENSP00000312673
GJB1	9606.ENSP00000354900
GOT2	9606.ENSP00000245206
GP2	9606.ENSP00000370767
GPC3	9606.ENSP00000377836
GPIHBP1	9606.ENSP00000480053
GPT	9606.ENSP00000378408
GPT2	9606.ENSP00000345282
GPX2	9606.ENSP00000374265
GPX3	9606.ENSP00000373477
GPX5	9606.ENSP00000392398
GPX6	9606.ENSP00000354581
GPX7	9606.ENSP00000354677
GPX8	9606.ENSP00000423822
GRN	9606.ENSP00000053867
GSN	9606.ENSP00000362924
GYPA	9606.ENSP00000354003
GYPB	9606.ENSP00000427690
GYPE	9606.ENSP00000351430
GZMM	9606.ENSP00000264553
HAMP	9606.ENSP00000471894
HAO1	9606.ENSP00000368066
HBA1	9606.ENSP00000322421
HBA2	9606.ENSP00000251595
HBB	9606.ENSP00000494175
HBD	9606.ENSP00000494708
HBE1	9606.ENSP00000292896
HBG1	9606.ENSP00000327431
HBG2	9606.ENSP00000338082
HBM	9606.ENSP00000349270
HBQ1	9606.ENSP00000199708
HBZ	9606.ENSP00000252951
HFE	9606.ENSP00000417404
HJV	9606.ENSP00000337014
HMGB1	9606.ENSP00000345347
HMOX1	9606.ENSP00000216117
HMOX2	9606.ENSP00000477572
HP	9606.ENSP00000348170
HPR	9606.ENSP00000441828
HPX	9606.ENSP00000265983
HRG	9606.ENSP00000232003
HSPG2	9606.ENSP00000363827
HTN1	9606.ENSP00000424501
HTN3	9606.ENSP00000432561
IAPP	9606.ENSP00000240652
ICAM1	9606.ENSP00000264832
IDO1	9606.ENSP00000430950
IFNA1	9606.ENSP00000276927
IFNG	9606.ENSP00000229135
IGFBP1	9606.ENSP00000275525
IGFBP3	9606.ENSP00000370473
IGHV3-16	9606.ENSP00000478725
IGKV1-33	9606.ENSP00000479032
IGKV1D-33	9606.ENSP00000482678
IL10	9606.ENSP00000412237
IL15	9606.ENSP00000296545
IL17A	9606.ENSP00000497968
IL1A	9606.ENSP00000263339
IL1B	9606.ENSP00000263341
IL2	9606.ENSP00000226730
IL4	9606.ENSP00000231449
IL6	9606.ENSP00000385675
INS	9606.ENSP00000380432
ITGAM	9606.ENSP00000496959
ITGB2	9606.ENSP00000380948
ITIH1	9606.ENSP00000273283
ITIH2	9606.ENSP00000351190
ITIH3	9606.ENSP00000415769
ITIH4	9606.ENSP00000266041
KLF1	9606.ENSP00000264834
KLK1	9606.ENSP00000301420
KLK3	9606.ENSP00000314151
KLK4	9606.ENSP00000326159
KLKB1	9606.ENSP00000264690
KNG1	9606.ENSP00000493985
LALBA	9606.ENSP00000301046
LBP	9606.ENSP00000217407
LCAT	9606.ENSP00000264005
LCN1	9606.ENSP00000263598
LCN2	9606.ENSP00000362108
LDHA	9606.ENSP00000445175
LDLRAD3	9606.ENSP00000318607
LEP	9606.ENSP00000312652
LGALS3	9606.ENSP00000254301
LGALS3BP	9606.ENSP00000262776
LIPC	9606.ENSP00000299022
LIPG	9606.ENSP00000261292
LPA	9606.ENSP00000321334
LPL	9606.ENSP00000497642
LPO	9606.ENSP00000262290
LRG1	9606.ENSP00000302621
LRP1	9606.ENSP00000243077
LRP2	9606.ENSP00000496870
LRP8	9606.ENSP00000303634
LTF	9606.ENSP00000231751
LUC7L	9606.ENSP00000293872
LUM	9606.ENSP00000266718
LYVE1	9606.ENSP00000256178
LYZ	9606.ENSP00000261267
MB	9606.ENSP00000352835
MBL2	9606.ENSP00000363079
MIS12	9606.ENSP00000370557
MMP1	9606.ENSP00000322788
MMP12	9606.ENSP00000458585
MMP13	9606.ENSP00000260302
MMP14	9606.ENSP00000308208
MMP16	9606.ENSP00000286614
MMP19	9606.ENSP00000313437
MMP2	9606.ENSP00000219070
MMP20	9606.ENSP00000260228
MMP21	9606.ENSP00000357798
MMP23B	9606.ENSP00000348308
MMP25	9606.ENSP00000337816
MMP26	9606.ENSP00000369753
MMP28	9606.ENSP00000473853
MMP3	9606.ENSP00000299855
MMP7	9606.ENSP00000260227
MMP8	9606.ENSP00000236826
MMP9	9606.ENSP00000361405
MPO	9606.ENSP00000225275
MRC1	9606.ENSP00000455897
MS4A4A	9606.ENSP00000338648
MS4A6A	9606.ENSP00000435844
MS4A7	9606.ENSP00000300184
MSR1	9606.ENSP00000405453
MT-CYB	9606.ENSP00000354554
MT1E	9606.ENSP00000328137
MTTP	9606.ENSP00000427679
MUC7	9606.ENSP00000407422
MYH6	9606.ENSP00000386041
MYOM2	9606.ENSP00000262113
NCAM1	9606.ENSP00000480132
NFE2	9606.ENSP00000439120
NGB	9606.ENSP00000298352
NGF	9606.ENSP00000358525
NOS3	9606.ENSP00000297494
NPC1L1	9606.ENSP00000289547
NPPA	9606.ENSP00000365663
NPPB	9606.ENSP00000365651
NR2F1	9606.ENSP00000325819
NT5E	9606.ENSP00000257770
OCLN	9606.ENSP00000347379
OLR1	9606.ENSP00000309124
ORM1	9606.ENSP00000259396
ORM2	9606.ENSP00000394936
ORMDL1	9606.ENSP00000326869
ORMDL2	9606.ENSP00000243045
ORMDL3	9606.ENSP00000377724
PCSK9	9606.ENSP00000303208
PCYOX1	9606.ENSP00000387654
PF4	9606.ENSP00000296029
PF4V1	9606.ENSP00000226524
PIGR	9606.ENSP00000348888
PIK3C2A	9606.ENSP00000265970
PLA2G10	9606.ENSP00000393847
PLA2G2A	9606.ENSP00000383364
PLA2G7	9606.ENSP00000274793
PLA2R1	9606.ENSP00000283243
PLAT	9606.ENSP00000220809
PLAU	9606.ENSP00000361850
PLG	9606.ENSP00000308938
PLIN2	9606.ENSP00000276914
PLTP	9606.ENSP00000417138
PON1	9606.ENSP00000222381
PON2	9606.ENSP00000488838
PON3	9606.ENSP00000265627
PPARD	9606.ENSP00000310928
PPARG	9606.ENSP00000287820
PPBP	9606.ENSP00000296028
PRDX2	9606.ENSP00000301522
PRG4	9606.ENSP00000399679
PROC	9606.ENSP00000234071
PRR4	9606.ENSP00000228811
PRSS1	9606.ENSP00000308720
PRSS3	9606.ENSP00000354280
PRTN3	9606.ENSP00000234347
PTGDS	9606.ENSP00000360687
PTH	9606.ENSP00000433208
PXDN	9606.ENSP00000252804
PXDNL	9606.ENSP00000348645
PZP	9606.ENSP00000261336
QSOX1	9606.ENSP00000356574
RBP2	9606.ENSP00000232217
RBP4	9606.ENSP00000360522
REN	9606.ENSP00000272190
RETN	9606.ENSP00000221515
RETNLB	9606.ENSP00000295755
RNASE1	9606.ENSP00000381057
RNASE3	9606.ENSP00000302324
RPS10	9606.ENSP00000481646
RPS12	9606.ENSP00000230050
RPS15	9606.ENSP00000466010
RPS15A	9606.ENSP00000318646
RPS17	9606.ENSP00000498019
RPS19	9606.ENSP00000470972
RPS21	9606.ENSP00000345957
RPS24	9606.ENSP00000414321
RPS25	9606.ENSP00000435096
RPS26	9606.ENSP00000348849
RPS27	9606.ENSP00000499044
RPS27A	9606.ENSP00000272317
RPS28	9606.ENSP00000472469
RPS29	9606.ENSP00000379339
RPS3A	9606.ENSP00000346050
RPS4X	9606.ENSP00000362744
RPS6	9606.ENSP00000369757
RPS7	9606.ENSP00000495273
RPS8	9606.ENSP00000379888
S100A12	9606.ENSP00000357726
S100A8	9606.ENSP00000357721
S100A9	9606.ENSP00000357727
SAA1	9606.ENSP00000384906
SAA2	9606.ENSP00000436126
SAA2-SAA4	9606.ENSP00000485552
SAA4	9606.ENSP00000278222
SCARB1	9606.ENSP00000261693
SCARB2	9606.ENSP00000264896
SCIN	9606.ENSP00000297029
SDC1	9606.ENSP00000370542
SELE	9606.ENSP00000331736
SELENOP	9606.ENSP00000425915
SERPINA1	9606.ENSP00000416066
SERPINA10	9606.ENSP00000261994
SERPINA3	9606.ENSP00000450540
SERPINA4	9606.ENSP00000451172
SERPINA5	9606.ENSP00000333203
SERPINA6	9606.ENSP00000342850
SERPINA7	9606.ENSP00000329374
SERPINC1	9606.ENSP00000356671
SERPIND1	9606.ENSP00000215727
SERPINE1	9606.ENSP00000223095
SERPINF1	9606.ENSP00000254722
SERPINF2	9606.ENSP00000321853
SERPING1	9606.ENSP00000278407
SHBG	9606.ENSP00000369816
SLC11A2	9606.ENSP00000378364
SLC25A37	9606.ENSP00000429200
SLC40A1	9606.ENSP00000261024
SLC46A1	9606.ENSP00000480703
SLC4A1	9606.ENSP00000262418
SLN	9606.ENSP00000435380
SPP1	9606.ENSP00000378517
SPP2	9606.ENSP00000168148
SPTLC3	9606.ENSP00000381968
STAB1	9606.ENSP00000312946
STAB2	9606.ENSP00000373539
STATH	9606.ENSP00000246895
SULT1A3	9606.ENSP00000378570
SULT1A4	9606.ENSP00000353600
TF	9606.ENSP00000385834
TFR2	9606.ENSP00000420525
TFRC	9606.ENSP00000376197
TG	9606.ENSP00000220616
TGFB1	9606.ENSP00000221930
THBD	9606.ENSP00000366307
THPO	9606.ENSP00000494504
TIMD4	9606.ENSP00000274532
TIMP1	9606.ENSP00000218388
TIMP2	9606.ENSP00000262768
TIMP4	9606.ENSP00000287814
TLR2	9606.ENSP00000260010
TLR4	9606.ENSP00000363089
TNF	9606.ENSP00000398698
TNNI3	9606.ENSP00000341838
TNNT2	9606.ENSP00000499593
TREM2	9606.ENSP00000362205
TSPO	9606.ENSP00000379563
TTR	9606.ENSP00000237014
VCAM1	9606.ENSP00000294728
VTN	9606.ENSP00000226218
VWF	9606.ENSP00000261405
